# Supplementary material for: Cholesterol-lowering Action of BNA-based Antisense Oligonucleotides Targeting PCSK9 in Atherogenic Diet-induced Hypercholesterolemic Mice
Source: PubMed Central journal article supplement — Mol Ther Nucleic Acids. 2012 May 15;1(5):e22–. doi: 10.1038/mtna.2012.16 (PMC3393380; doi:10.1038/mtna.2012.16), 2012-05-15
Supplement: mtna201216x3.pdf [file mtna201216x3.pdf]

**Table S1. Serum cholesterol levels in atherogenic diet-fed mice after four weeks of P900SL treatment.**

|                 | <b>Total-C</b>      | <b>CM-C</b>                   | <b>VLDL-C</b>                   | <b>LDL-C</b>                  | <b>HDL-C</b>                    |
|-----------------|---------------------|-------------------------------|---------------------------------|-------------------------------|---------------------------------|
| <b>Saline</b>   | <b>351.3 ± 32.7</b> | <b>5.9 ± 1.4</b>              | <b>226.4 ± 25.1</b>             | <b>51.5 ± 8.0</b>             | <b>67.4 ± 4.2</b>               |
| <b>1 mg/kg</b>  | <b>338.7 ± 39.1</b> | <b>9.2 ± 1.8<sup>a</sup></b>  | <b>202.8 ± 37.3</b>             | <b>46.2 ± 4.1</b>             | <b>80.5 ± 10.2<sup>a</sup></b>  |
| <b>5 mg/kg</b>  | <b>307.2 ± 28.8</b> | <b>9.7 ± 2.3<sup>a</sup></b>  | <b>174.2 ± 27.9<sup>a</sup></b> | <b>40.2 ± 3.8<sup>a</sup></b> | <b>83.1 ± 4.4<sup>b</sup></b>   |
| <b>10 mg/kg</b> | <b>338.0 ± 20.9</b> | <b>13.8 ± 5.7<sup>a</sup></b> | <b>196.2 ± 16.3</b>             | <b>33.0 ± 3.9<sup>b</sup></b> | <b>94.9 ± 10.7<sup>b</sup></b>  |
| <b>20 mg/kg</b> | <b>315.0 ± 42.6</b> | <b>14.7 ± 6.7<sup>a</sup></b> | <b>165.0 ± 37.2<sup>a</sup></b> | <b>32.3 ± 9.0<sup>b</sup></b> | <b>103.0 ± 10.8<sup>b</sup></b> |

Blood samples were collected from mice tail veins after four weeks of administration. The units for all the values in the table are mg/dL (± SD). <sup>a</sup>,<sup>b</sup>Values in the line with superscripts indicate significant differences versus saline-treated arm. (<sup>a</sup>*P* < 0.05, <sup>b</sup>*P* < 0.01).
