# Supplementary material for: Cholesterol-lowering Action of BNA-based Antisense Oligonucleotides Targeting PCSK9 in Atherogenic Diet-induced Hypercholesterolemic Mice
Source: PubMed Central journal article supplement — Mol Ther Nucleic Acids. 2012 May 15;1(5):e22–. doi: 10.1038/mtna.2012.16 (PMC3393380; doi:10.1038/mtna.2012.16), 2012-05-15
Supplement: mtna201216x5.pdf [file mtna201216x5.pdf]

**Table S3. Toxicological parameters**

|         | P90ISL      |             |                          |             | P90ISNC     |             |             |             |
|---------|-------------|-------------|--------------------------|-------------|-------------|-------------|-------------|-------------|
|         | AST (mg/dL) | ALT (mg/dL) | BUN (mg/dL)              | CRE (mg/dL) | AST (mg/dL) | ALT (mg/dL) | BUN (mg/dL) | CRE (mg/dL) |
| Saline  | 60 ± 23.6   | 21 ± 4.2    | 36.0 ± 5.3               | 1.1 ± 0.05  | 89 ± 37.6   | 45 ± 18.9   | 41.4 ± 5.4  | 1.1 ± 0.07  |
| 1mg/kg  | 60 ± 24.8   | 22 ± 9.7    | 38.0 ± 4.9               | 1.1 ± 0.02  | 60 ± 22.7   | 23 ± 9.5    | 41.8 ± 10.0 | 1.1 ± 0.12  |
| 5mg/kg  | 69 ± 58.4   | 19 ± 3.8    | 45.0 ± 8.0               | 1.0 ± 0.09  | 65 ± 26.2   | 36 ± 16.2   | 38.8 ± 4.5  | 1.0 ± 0.05  |
| 10mg/kg | 43 ± 7.2    | 16 ± 3.8    | 50.7 ± 10.1 <sup>a</sup> | 1.0 ± 0.01  | 58 ± 12.6   | 26 ± 8.1    | 43.9 ± 9.2  | 1.1 ± 0.05  |
| 20mg/kg | 55 ± 7.7    | 34 ± 14.6   | 48.1 ± 16.0              | 1.0 ± 0.05  |             |             |             |             |

Blood samples were collected from mice tail veins after 6 weeks of administration.

<sup>a</sup>Values in the line with superscripts indicate significant differences ( $P < 0.05$ ) ( $\pm$  SD).
