# Supplementary figures and images for: Cholesterol-lowering Action of BNA-based Antisense Oligonucleotides Targeting PCSK9 in Atherogenic Diet-induced Hypercholesterolemic Mice
Source: PubMed Central journal article supplement — Mol Ther Nucleic Acids. 2012 May 15;1(5):e22–. doi: 10.1038/mtna.2012.16 (PMC3393380; doi:10.1038/mtna.2012.16), 2012-05-15

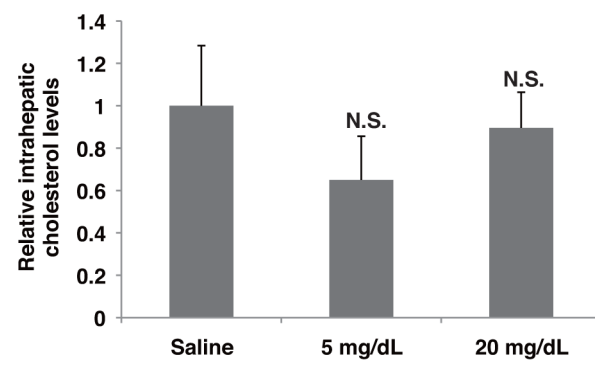

Supplement: mtna201216x1.pdf [file mtna201216x1.pdf]

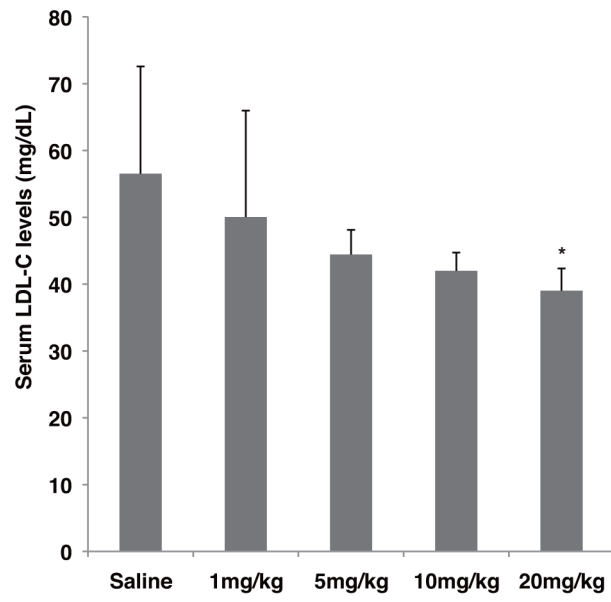

Supplement: mtna201216x2.pdf [file mtna201216x2.pdf]
